# Supplementary material
Source: PubMed Central journal article supplement (PMC2892857)
Supplement: NIHMS70658-supplement-04.pdf [file NIHMS70658-supplement-04.pdf]

| <b>Fold activation of WREs</b> |                 |                 |                |
|--------------------------------|-----------------|-----------------|----------------|
| WREs                           | Arm*            |                 | Wg-CM          |
|                                | S2R+            | Clone8          | Kc167          |
| UpE1                           | 225 ( $\pm$ 26) | 40 ( $\pm$ 2)   | 32 ( $\pm$ 5)  |
| UpE2                           | 270 ( $\pm$ 12) | 348 ( $\pm$ 18) | 20 ( $\pm$ 4)  |
| IntE(255 bp)                   | 66 ( $\pm$ 6)   | 109 ( $\pm$ 2)  | 126 ( $\pm$ 8) |
